# Psychiatric Services

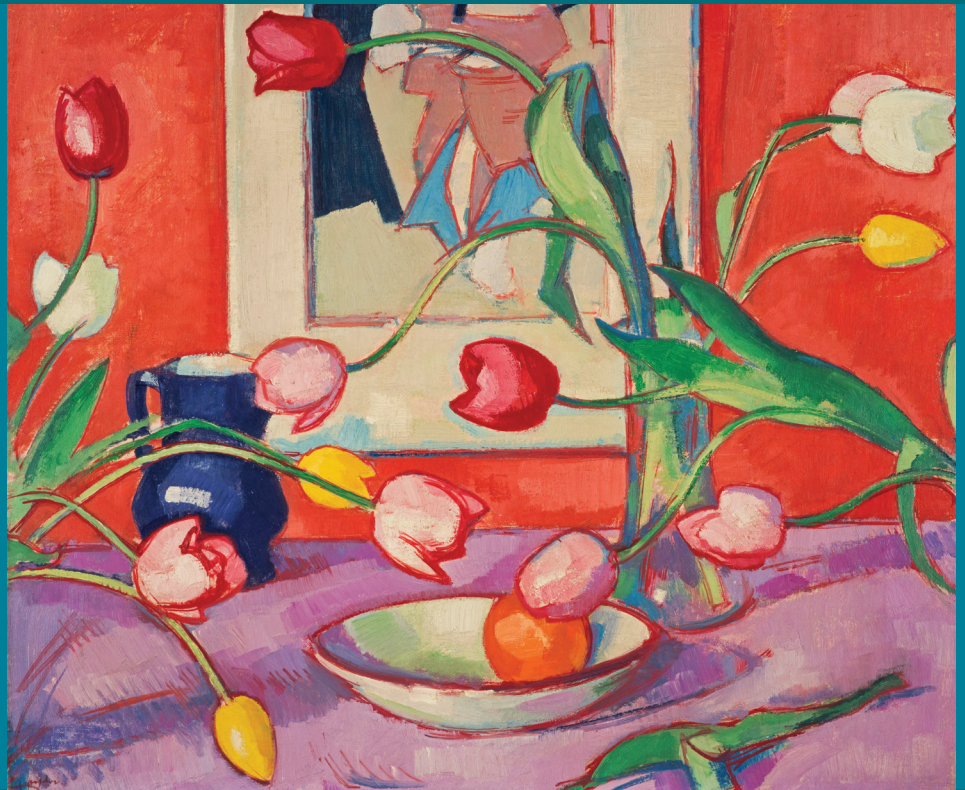

Editorial: Three Rs for *Psychiatric Services*

Telepsychiatry in U.S. emergency departments

Recovery after requesting physician-assisted death

Responding to COVID-19 in inpatient psychiatry
