# Psychiatric Services welcomes submissions!

*Psychiatric Services* features research related to the delivery of mental health services, especially for people with serious mental illness in community-based treatment programs. Provision of high-quality care involves collaboration among a variety of professionals. Clinicians, administrators, and policy makers look to *Psychiatric Services* for research on how to deliver evidence-based treatments, to take an integrated “whole-health” approach to care, and to better engage individuals in their care. Mental health’s current focus on patient-centered, recovery-oriented care and on dissemination of evidence-based practices is transforming service delivery systems at all levels. Research published in *Psychiatric Services* contributes to this transformation.

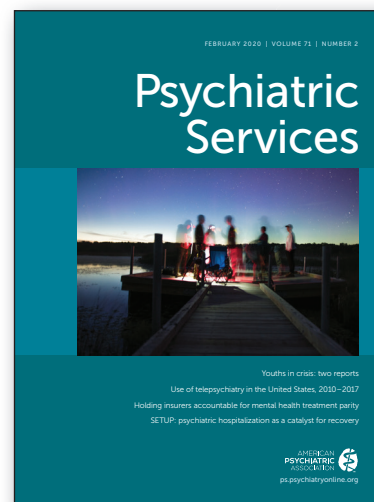

## Our Most Talked About Articles in 2019:

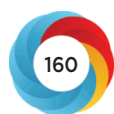

### Increases in Demand for Crisis and Other Suicide Prevention Services After a Celebrity Suicide

Brief report in *Psychiatric Services*, April 2019

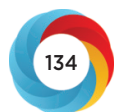

### Reduction of Postdischarge Suicidal Behavior Among Adolescents Through a Telephone-Based Intervention

Article in *Psychiatric Services*, April 2019

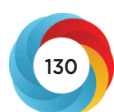

### Mental Health Treatment and Unmet Mental Health Care Need Among Pregnant Women With Major Depressive Episode in the United States

Brief report in *Psychiatric Services*, April 2019

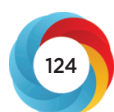

### User Engagement in Mental Health Apps: A Review of Measurement, Reporting, and Validity

Article in *Psychiatric Services*, March 2019

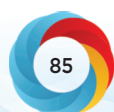

### Establishing Sanctioned Safe Consumption Sites in the United States: Five Jurisdictions Moving the Policy Agenda Forward

Article in *Psychiatric Services*, February 2019
